1 **Stability-normalised walking speed: a new approach for human gait**  
2 **perturbation research**

3

4 Christopher McCrum<sup>1,2\*</sup>, Paul Willems<sup>1</sup>, Kiros Karamanidis<sup>3</sup>, Kenneth Meijer<sup>1</sup>

5

6 <sup>1</sup>Department of Nutrition and Movement Sciences, NUTRIM School of Nutrition and  
7 Translational Research in Metabolism, Maastricht University Medical Centre+, Maastricht,  
8 The Netherlands

9 <sup>2</sup>Institute of Movement and Sport Gerontology, German Sport University Cologne, Germany

10 <sup>3</sup>Sport and Exercise Science Research Centre, School of Applied Sciences, London South  
11 Bank University, London, UK

12

13 \*Correspondence:

14 Christopher McCrum

15 Department of Nutrition and Movement Sciences

16 Maastricht University,

17 PO Box 616, Maastricht, 6200 MD, The Netherlands

18 +31 (0) 43 388 4219

19 [chris.mccrum@maastrichtuniversity.nl](mailto:chris.mccrum@maastrichtuniversity.nl)

20

21

22

23

24

25

26 **Abstract**

27 In gait stability research, neither self-selected walking speeds, nor the same prescribed  
28 walking speed for all participants, guarantee equivalent gait stability among participants.  
29 Furthermore, these options may differentially affect the response to different gait  
30 perturbations, which is problematic when comparing groups with different capacities. We  
31 present a method for decreasing inter-individual differences in gait stability by adjusting  
32 walking speed to equivalent margins of stability (MoS). Eighteen healthy adults walked on a  
33 split-belt treadmill for two-minute bouts at 0.4m/s up to 1.8m/s in 0.2m/s intervals. The  
34 stability-normalised walking speed (MoS=0.05m) was calculated using the mean MoS at  
35 touchdown of the final 10 steps of each speed. Participants then walked for three minutes at  
36 this speed and were subsequently exposed to a treadmill belt acceleration perturbation. A  
37 further 12 healthy adults were exposed to the same perturbation while walking at 1.3m/s: the  
38 average of the previous group. Large ranges in MoS were observed during the prescribed  
39 speeds (6-10cm across speeds) and walking speed significantly ( $P<0.001$ ) affected MoS. The  
40 stability-normalised walking speeds resulted in MoS equal or very close to the desired 0.05m  
41 and reduced between-participant variability in MoS. The second group of participants  
42 walking at 1.3m/s had greater inter-individual variation in MoS during both unperturbed and  
43 perturbed walking compared to 12 sex, height and leg length-matched participants from the  
44 stability-normalised walking speed group. The current method decreases inter-individual  
45 differences in gait stability which may be beneficial for gait perturbation and stability  
46 research, in particular for studies on populations with different locomotor capacities.

47

48 **Keywords:** locomotion, margins of stability, falls, postural balance, motor control, dynamic  
49 stability

50

51 **Introduction**

52 Mechanical perturbations have been used for decades to investigate the stability of human  
53 walking (Berger et al., 1984; Marigold and Patla, 2002; Nashner, 1980; Quintern et al., 1985;  
54 Vilensky et al., 1999) and are now frequently investigated in falls prevention contexts  
55 (Gerards et al., 2017; Mansfield et al., 2015; Pai and Bhatt, 2007). In gait perturbation  
56 studies, self-selected walking speeds (e.g. Pai et al., 2014) or a prescribed walking speed for  
57 all participants (e.g. McCrum et al., 2016a) are commonly used, but each comes with  
58 drawbacks that complicate the interpretation of results. A prescribed walking speed will not  
59 result in comparable stability for all participants. This is problematic when comparing groups  
60 with different capacities during a gait perturbation task, as the relative challenge of the task  
61 will vary. Self-selected walking speeds, however, introduce other problems. Walking speed  
62 affects recovery strategy choice following slips (Bhatt et al., 2005) and trips (Krasovsky et  
63 al., 2014), the direction of balance loss following slipping (Smeesters et al., 2001) and  
64 differentially affects falls risk following tripping and slipping (Bhatt et al., 2005; Espy et al.,  
65 2010; Pavol et al., 1999). Gait stability at perturbation onset may also not be optimised at the  
66 self-selected speed and may differ across groups (Bhatt et al., 2005; Hak et al., 2013;  
67 Mademli and Arampatzis, 2014; Süptitz et al., 2012). The assessment of gait stability is also  
68 confounded by walking speed, which affects measures of dynamic gait stability using a centre  
69 of mass – base of support relationship model (Bhatt et al., 2005; Hak et al., 2013; Süptitz et  
70 al., 2012). Therefore, more sophistication in the choice of walking speed may be necessary  
71 for detailed study of reactive gait stability and adaptation processes.

72 Two possible solutions have been applied in previous gait perturbation studies. Two studies  
73 used 60% of the walk-to-run velocity to normalise the speed to participants' neuromuscular  
74 capacities (Bierbaum et al., 2010, 2011) and a Froude number (a dimensionless parameter)  
75 for walking speed (Hof, 1996) has been applied to normalise the walking speed based on leg

76 length (Aprigliano et al., 2016; Aprigliano et al., 2017; Martelli et al., 2013; Martelli et al.,  
77 2016). However, as these are normalisations based on a single parameter, neither of which  
78 are the sole determinants of gait stability, not all of the above described issues will be  
79 addressed. Therefore, further attempts to tackle these issues are warranted (McCrum et al.,  
80 2016b; McCrum et al., 2017).

81 Here, we present a new method for decreasing inter-individual differences in gait stability by  
82 normalising the walking speed based on gait stability. For this method we use the margins of  
83 stability (MoS) concept (Hof et al., 2005), one of the few well-defined and well-accepted  
84 biomechanical measures of mechanical stability of the body configuration during locomotion  
85 (Bruijn et al., 2013), useful for assessing changes in gait stability due to mechanical  
86 perturbations and balance loss. Additionally, we present results from a gait perturbation  
87 experiment comparing participants walking at their stability-normalised walking speed with  
88 participants walking all at the same prescribed speed.

89

## 90 **Methods**

### 91 *Participants*

92 Eighteen healthy adults participated in the first part of this study (eight males, 10 females;  
93 age:  $24.4 \pm 2.5$ y; height:  $174.9 \pm 7.4$ cm; weight:  $74.6 \pm 15.2$ kg). Twelve healthy adults  
94 participated in the second part of the study (Table 1). The participants had no self-reported  
95 history of walking difficulties, dizziness or balance problems, and had no known  
96 neuromuscular condition or injury that could affect balance or walking. Informed consent  
97 was obtained and the study was conducted in accordance with the Declaration of Helsinki.  
98 The study protocol was approved by the Maastricht University Medical Centre medical ethics  
99 committee.

100

101 *Setup and Procedures*

102 The Computer Assisted Rehabilitation Environment Extended (CAREN; Motekforce Link,  
103 Amsterdam, The Netherlands), comprised of a dual-belt force plate-instrumented treadmill  
104 (Motekforce Link, Amsterdam, The Netherlands; 1000Hz), a 12-camera motion capture  
105 system (100Hz; Vicon Motion Systems, Oxford, UK) and a virtual environment that provided  
106 optic flow, was used for this study. A safety harness connected to an overhead frame was  
107 worn by the participants during all measurements. Five retroreflective markers were attached  
108 to anatomical landmarks (C7, left and right trochanter and left and right hallux) and were  
109 tracked by the motion capture system.

110 In the first part of the study (18 participants), the measurement sessions began with 60s  
111 familiarisation trials of walking at 0.4m/s up to 1.8m/s in 0.2m/s intervals. After  
112 approximately five to ten minutes rest, single two-to-three-minute-long measurements were  
113 then conducted at the same speeds. Following these measurements, the stability-normalised  
114 walking speed was calculated. To determine the stability-normalised walking speed, the mean  
115 anteroposterior MoS (see below) at foot touchdown of the final 10 steps of each walking trial  
116 (0.4m/s to 1.8m/s) were taken and fitted with a second order polynomial function. For each  
117 participant, the speed resulting in MoS of 0.05m was calculated. Based on our pilot testing,  
118 this value would result in walking speeds that would be possible for healthy adults of most  
119 ages. With certain populations, slower walking speeds would be required and then a greater  
120 MoS could be used. Participants then walked for three minutes at their stability-normalised  
121 walking speed, at the end of which, a gait perturbation was applied without warning. The  
122 perturbation consisted of a  $3\text{m/s}^2$  acceleration of the right treadmill belt to 180% of the  
123 stability-normalised walking speed, thereby we also normalised the magnitude of the  
124 perturbation to the already normalised walking speed. The perturbation was triggered  
125 automatically by the D-Flow software of the CAREN, when the hallux marker of the to-be-

126 perturbed limb became anterior to the stance limb hallux marker in the sagittal plane. The belt  
127 decelerated after toe-off of the perturbed limb.

128 In the second part of the study, 12 participants completed the same familiarisation protocol  
129 and then walked for three minutes at 1.3m/s (average stability-normalised walking speed of  
130 the 18 participants in the first part of the study). After this, they experienced the same  
131 treadmill belt acceleration perturbation. To compare these results with a matched sample, 12  
132 participants from the first group of 18 were selected and matched specifically for sex, height  
133 and leg length to the participants in part two of the study (Table 1).

134

#### 135 *Data Processing*

136 Marker tracks were filtered using a low pass second order Butterworth filter (zero-phase)  
137 with a 12Hz cut-off frequency. Foot touchdown was detected using a combination of force  
138 plate (50N threshold) and foot marker data (Zeni et al., 2008). The anteroposterior MoS were  
139 calculated at foot touchdown as the difference between the anterior boundary of the base of  
140 support (anteroposterior component of the hallux marker projection to the ground) and the  
141 extrapolated centre of mass as defined by Hof et al. (2005), adapted for our reduced  
142 kinematic model based on Süptitz et al. (2012). The MoS was calculated for: the final 10  
143 steps of each set walking speed in the first part of the study; the mean MoS of the eleventh to  
144 second last step before each perturbation (Base); the final step before each perturbation (Pre);  
145 and the first recovery step following each perturbation (Post1).

146

#### 147 *Statistics*

148 A mixed effects model for repeated measures with walking speed as a fixed effect and Tukey  
149 post hoc comparisons was used to confirm a walking speed effect on the MoS. To determine  
150 whether a normalisation of walking speed based on body dimensions would assume

151 equivalent gait stability, Pearson correlations between the stability-normalised walking  
152 speeds and participants' height and leg length were conducted. A two-way repeated measures  
153 ANOVA with participant group (Stability-normalised walking speed [Norm] and 1.3m/s) and  
154 step (Base, Pre, Post1) as factors with post hoc Sidak's tests for multiple comparisons were  
155 used to determine between group differences in the MoS. Equivalence tests using 90%  
156 confidence intervals were used to confirm the similarity of the groups' demographics.  
157 Significance was set at  $\alpha=0.05$ . Analyses were performed using Prism version 8 for Windows  
158 (GraphPad Software Inc., La Jolla, California, USA).

159

## 160 **Results and Discussion**

161 Walking speed significantly affected the MoS ( $F_{[2,547, 42,93]}=1485, P<0.0001$ ; Fig. 1) and  
162 Tukey's multiple comparisons tests revealed significant differences for each speed compared  
163 to all other speeds ( $P<0.0001$ ; Fig. 1). These results agree with previous work (Bhatt et al.,  
164 2005; Hak et al., 2013; Süptitz et al., 2012). A range of MoS values were observed for each  
165 speed (approximately 6-10cm), even among these healthy participants, confirming some of  
166 the issues related to prescribed walking speeds in gait stability research discussed above. The  
167 strong relationship between walking speed and MoS also has relevance for clinical studies  
168 conducting self-paced gait measurements with an assessment of gait stability. Patients who  
169 improve in walking speed may demonstrate a reduction in MoS, which may not be reductions  
170 in the stability of the patients' gait *per se*, but simply an artefact of the improved walking  
171 speed.

172

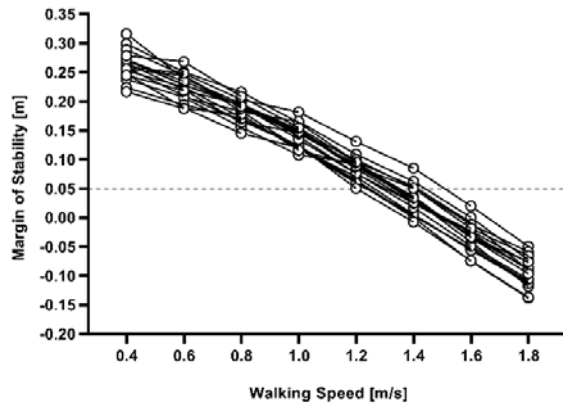

173

174 *Fig. 1: Individual margins of stability at foot touchdown over the different walking speeds. The dashed line*  
175 *represents the margin of stability used to determine the stability-normalised walking speed.*

176

177 The stability-normalised walking speeds (range from 1.22m/s to 1.51m/s with a mean±SD of  
178  $1.3\pm 0.1$ m/s) resulted in MoS very close to the desired outcome of 0.05m (within one SD of  
179 the mean MoS for 15 of the 18 participants; Fig. 2A). The stability-normalised walking speed  
180 also reduced between-participant variability in MoS (as shown by the group level standard  
181 deviations; Fig. 2B). These combined results indicate that the stability-normalisation was  
182 successful in reducing between-participant differences in MoS during walking, even in a  
183 homogenous group of healthy young adults.



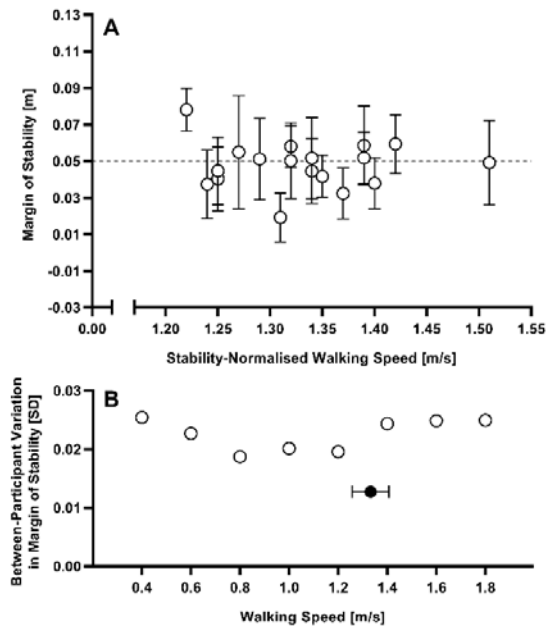

184

185 **Fig. 2:** *A: Means and standard deviations of the margins of stability at touchdown of the final 10 steps at the*  
186 *stability-normalised walking speed for each individual participant. The desired MoS of 0.05m at foot touchdown*  
187 *is indicated by the dashed line. B: The between-participant variation in the margins of stability (standard*  
188 *deviation at group level) for the final 10 steps at each walking speed (the stability-normalised walking speed*  
189 *trials are indicated with the black circle; mean and standard deviation).*

190

191 Small, non-significant correlations between the determined stability-normalised walking  
192 speeds and the participants' height and leg length were found (Fig. 3). The outcomes of our  
193 correlation analysis suggest that height and leg length did not significantly affect the  
194 calculation of stability-normalised walking speed, suggesting that a normalisation of walking  
195 speed based on body dimensions does not assume equivalent gait stability, at least not when  
196 assessed by the MoS concept.

197

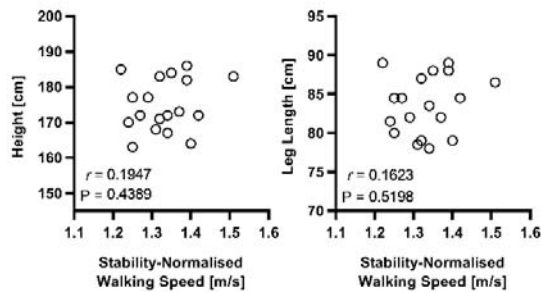

198

199 **Fig. 3:** Pearson correlations between the participants' stability-normalised walking speeds and their height and  
200 leg length.

201

202 For the second part of the study, the 12 participants were successfully matched to the 12 of  
203 the 18 participants from part one of the study (Table 1). During the perturbations, the 1.3m/s  
204 group had a greater range in MoS values during Base, Pre and Post1 (Fig. 4). A two-way  
205 repeated measures ANOVA revealed a significant effect of group ( $F_{[1, 22]}=6.409$ ,  $P=0.019$ ),  
206 step ( $F_{[1.097, 24.14]}=8.34$ ,  $P=0.0068$ ) and a significant group by step interaction ( $F_{[2, 44]}=15.4$ ,  
207  $P<0.0001$ ) on MoS. Sidak post hoc tests revealed a significant difference between Norm and  
208 1.3m/s groups at Post1 ( $P=0.0049$ ). While part of the differences found may be due to  
209 chance, the current comparison suggests that the stability-normalised walking speed and the  
210 normalised perturbation (acceleration to a peak speed 180% of the walking speed) reduce the  
211 inter-individual differences in MoS during both unperturbed and perturbed walking, at least  
212 with the current protocol. The significant difference found at Post1 between the groups also  
213 aligns with the previous studies reporting different responses to perturbations experienced  
214 while walking at different speeds (Bhatt et al., 2005; Krasovsky et al., 2014).

215

216

217

218

219 Table 1: Demographic characteristics of the participant groups in part two of the study.

|                                               | Sex                   | Age (y)  | Height (cm) | Weight (kg) | Leg Length (cm) |
|-----------------------------------------------|-----------------------|----------|-------------|-------------|-----------------|
| 1.3m/s Group                                  | 8 males,<br>4 females | 25.1±3.8 | 178.2±5.2   | 72.5±9.7    | 84.2±2.1        |
| Norm Group                                    | 8 males,<br>4 females | 24.3±2.9 | 178.7±5.8   | 79±15.3     | 85.5±2.8        |
| Equivalent based on 90% Confidence Intervals? | -                     | Yes      | Yes         | Yes         | Yes             |

220

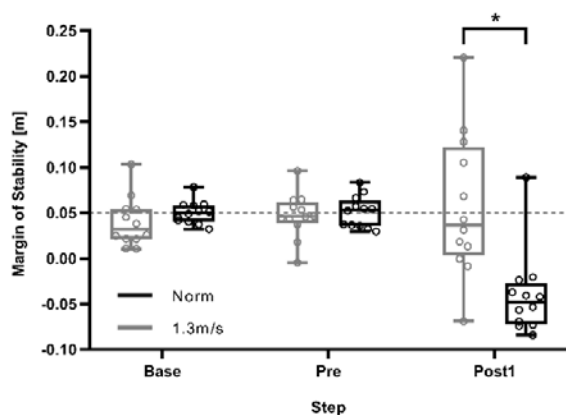

221

222 **Fig. 4:** Margins of stability during unperturbed and perturbed walking of participants walking at their stability-  
 223 normalised walking speed (Norm) and participants walking at 1.3m/s. Base: the mean MoS of the eleventh to  
 224 second last step before each perturbation; Pre: the final step before each perturbation; Post1: the first recovery  
 225 step following perturbation. \*: Significant difference (Sidak post hoc test:  $P=0.0049$ ).

226

227 As the MoS – walking speed relationship from 1.0-1.6m/s appeared to be linear in part one of  
 228 the study (Fig. 1), a simple linear regression was calculated for 1.0-1.6m/s. A significant  
 229 regression equation was found (Fig. 5). Future research could use this (or similar) as a simple,  
 230 efficient method for increasing the dynamic similarity in gait stability across participants, by  
 231 measuring participants walking at a single speed from 1.0-1.6m/s and using this equation to  
 232 prescribe speeds that would result in similar MoS values. It is, however, worth highlighting  
 233 that the current participants were young healthy adults; the walking speed – MoS relationship  
 234 may be altered in other populations.

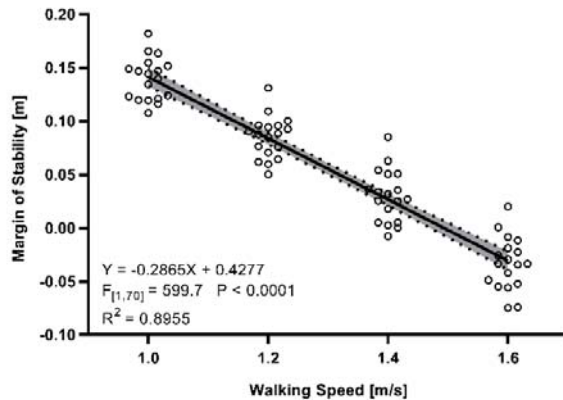

235

236 *Fig. 5: Margins of stability as a function of walking speed between 1.0 and 1.6m/s. The shaded area represents*  
237 *the 95% confidence intervals of the regression line.*

238

239 In conclusion, large ranges in MoS were observed and walking speed significantly affected  
240 MoS even within these young healthy participants, confirming some issues related to walking  
241 speed choice in gait stability research. The current methods reduced between-participant  
242 variability in MoS during both unperturbed and perturbed walking, meaning that the method  
243 could be beneficial for gait stability studies comparing groups with different locomotor  
244 capacities. An equation has been provided that can be used following a single gait trial to  
245 increase the dynamic similarity of gait stability between participants.

246

#### 247 **Conflict of Interest Statement**

248 The authors declare no conflict of interest.

249

#### 250 **Acknowledgements**

251 CM was funded by the Kootstra Talent Fellowship awarded by the Centre for Research  
252 Innovation, Support and Policy (CRISP) and by the NUTRIM Graduate Programme, both of  
253 Maastricht University Medical Center+. The authors thank Julia Agmon for assistance with  
254 the measurements.

255 **References**

- 256 Aprigliano, F., Martelli, D., Micera, S., Monaco, V., 2016. Intersegmental coordination  
257 elicited by unexpected multidirectional slipping-like perturbations resembles that adopted  
258 during steady locomotion. *J. Neurophysiol.* 115, 728-740.
- 259 Aprigliano, F., Martelli, D., Tropea, P., Pasquini, G., Micera, S., Monaco, V., 2017. Aging  
260 does not affect the intralimb coordination elicited by slip-like perturbation of different  
261 intensities. *J. Neurophysiol.* 118, 1739-1748.
- 262 Berger, W., Dietz, V., Quintern, J., 1984. Corrective reactions to stumbling in man: neuronal  
263 co-ordination of bilateral leg muscle activity during gait. *J. Physiol.* 357, 109-125.
- 264 Bhatt, T., Wening, J.D., Pai, Y.C., 2005. Influence of gait speed on stability: recovery from  
265 anterior slips and compensatory stepping. *Gait Posture* 21, 146-156.
- 266 Bierbaum, S., Peper, A., Karamanidis, K., Arampatzis, A., 2010. Adaptational responses in  
267 dynamic stability during disturbed walking in the elderly. *J. Biomech.* 43, 2362-2368.
- 268 Bierbaum, S., Peper, A., Karamanidis, K., Arampatzis, A., 2011. Adaptive feedback potential  
269 in dynamic stability during disturbed walking in the elderly. *J. Biomech.* 44, 1921-1926.
- 270 Bruijn, S.M., Meijer, O.G., Beek, P.J., van Dieen, J.H., 2013. Assessing the stability of  
271 human locomotion: a review of current measures. *J. R. Soc. Interface* 10, 20120999.
- 272 Espy, D.D., Yang, F., Bhatt, T., Pai, Y.C., 2010. Independent influence of gait speed and step  
273 length on stability and fall risk. *Gait Posture* 32, 378-382.
- 274 Gerards, M.H.G., McCrum, C., Mansfield, A., Meijer, K., 2017. Perturbation-based balance  
275 training for falls reduction among older adults: Current evidence and implications for clinical  
276 practice. *Geriatr. Gerontol. Int.* 17, 2294-2303.
- 277 Hak, L., Houdijk, H., Beek, P.J., van Dieen, J.H., 2013. Steps to take to enhance gait  
278 stability: the effect of stride frequency, stride length, and walking speed on local dynamic  
279 stability and margins of stability. *PLoS One* 8, e82842.

- 280 Hof, A.L., 1996. Scaling gait data to body size. *Gait Posture* 4, 222-223.
- 281 Hof, A.L., Gazendam, M.G., Sinke, W.E., 2005. The condition for dynamic stability. *J.*
- 282 *Biomech.* 38, 1-8.
- 283 Krasovsky, T., Lamontagne, A., Feldman, A.G., Levin, M.F., 2014. Effects of walking speed
- 284 on gait stability and interlimb coordination in younger and older adults. *Gait Posture* 39, 378-
- 285 385.
- 286 Mademli, L., Arampatzis, A., 2014. Lower safety factor for old adults during walking at
- 287 preferred velocity. *Age* 36, 9636.
- 288 Mansfield, A., Wong, J.S., Bryce, J., Knorr, S., Patterson, K.K., 2015. Does perturbation-
- 289 based balance training prevent falls? Systematic review and meta-analysis of preliminary
- 290 randomized controlled trials. *Phys. Ther.* 95, 700-709.
- 291 Marigold, D.S., Patla, A.E., 2002. Strategies for dynamic stability during locomotion on a
- 292 slippery surface: effects of prior experience and knowledge. *J. Neurophysiol.* 88, 339-353.
- 293 Martelli, D., Monaco, V., Bassi Luciani, L., Micera, S., 2013. Angular momentum during
- 294 unexpected multidirectional perturbations delivered while walking. *IEEE Trans. Biomed.*
- 295 *Eng.* 60, 1785-1795.
- 296 Martelli, D., Vashista, V., Micera, S., Agrawal, S.K., 2016. Direction-Dependent Adaptation
- 297 of Dynamic Gait Stability Following Waist-Pull Perturbations. *IEEE Trans. Neural Syst.*
- 298 *Rehabil. Eng.* 24, 1304-1313.
- 299 McCrum, C., Epro, G., Meijer, K., Zijlstra, W., Brüggemann, G.P., Karamanidis, K., 2016a.
- 300 Locomotor stability and adaptation during perturbed walking across the adult female lifespan.
- 301 *J. Biomech.* 49, 1244-1247.
- 302 McCrum, C., Essers, J.M., Jie, L.J., Liu, W.Y., Meijer, K., 2016b. Commentary: Older adults
- 303 can improve compensatory stepping with repeated postural perturbations. *Front. Aging*
- 304 *Neurosci.* 8, 111.

305 McCrum, C., Gerards, M.H.G., Karamanidis, K., Zijlstra, W., Meijer, K., 2017. A systematic  
306 review of gait perturbation paradigms for improving reactive stepping responses and falls risk  
307 among healthy older adults. *Eur. Rev. Aging Phys. Act.* 14, 3.

308 Nashner, L.M., 1980. Balance adjustments of humans perturbed while walking. *J.*  
309 *Neurophysiol.* 44, 650-664.

310 Pai, Y.C., Bhatt, T.S., 2007. Repeated-slip training: an emerging paradigm for prevention of  
311 slip-related falls among older adults. *Phys. Ther.* 87, 1478-1491.

312 Pai, Y.C., Yang, F., Bhatt, T., Wang, E., 2014. Learning from laboratory-induced falling:  
313 long-term motor retention among older adults. *Age* 36, 9640.

314 Pavol, M.J., Owings, T.M., Foley, K.T., Grabiner, M.D., 1999. Gait characteristics as risk  
315 factors for falling from trips induced in older adults. *J. Gerontol. A Biol. Sci. Med. Sci.* 54,  
316 M583-590.

317 Quintern, J., Berger, W., Dietz, V., 1985. Compensatory reactions to gait perturbations in  
318 man: short- and long-term effects of neuronal adaptation. *Neurosci. Lett.* 62, 371-376.

319 Smeesters, C., Hayes, W.C., McMahon, T.A., 2001. Disturbance type and gait speed affect  
320 fall direction and impact location. *J. Biomech.* 34, 309-317.

321 Süptitz, F., Karamanidis, K., Catala, M.M., Brüggemann, G.P., 2012. Symmetry and  
322 reproducibility of the components of dynamic stability in young adults at different walking  
323 velocities on the treadmill. *J. Electromyogr. Kinesiol.* 22, 301-307.

324 Vilensky, J.A., Cook, J.A., Cooper, J.L., 1999. Stumbling corrective responses in healthy  
325 human subjects to rapid reversal of treadmill direction. *J. Electromyogr. Kinesiol.* 9, 161-171.

326 Zeni, J.A., Jr., Richards, J.G., Higginson, J.S., 2008. Two simple methods for determining  
327 gait events during treadmill and overground walking using kinematic data. *Gait Posture* 27,  
328 710-714.
